# Supplementary material for: Inter- and intra-specific pan-genomes of Borrelia burgdorferi sensu lato: genome stability and adaptive radiation
Source: PubMed Central journal article supplement (PMC3833655; doi:10.1186/1471-2164-14-693), 2013-10-10
Supplement: 1471-2164-14-693-S2.pdf [file 1471-2164-14-693-S2.pdf]

**Supplementary Table 2 : *B. burgdorferi* s.s chromosomal indels >25 bp**

| Strain   | Indel | 1       | 2   | 3 | 4  |
|----------|-------|---------|-----|---|----|
| 64b      |       | +fs     | 7   | 3 | 12 |
| 72a      |       | +       | 5   | 4 | 11 |
| 94a      |       | +fs     | 6   | 4 | 11 |
| 118a     |       | +fs     | 7   | 4 | 11 |
| 156a     |       | -fs     | 8   | 5 | 11 |
| 29805    |       | +       | 6   | 3 | 11 |
| B31      |       | +fs     | 7   | 5 | 12 |
| Bol26    |       | +       | 7   | 4 | 11 |
| CA-11.2A |       | +fs     | 6   | 5 | 11 |
| JD1      |       | -fs     | 6   | 5 | 11 |
| N40      |       | - fs,st | 7fs | 3 | 10 |
| WI91-23  |       | -fs     | 7fs | 4 | 11 |
| ZS7      |       | +       | 5   | 4 | 12 |

**Footnotes for Supplementary Table 2**

- 1 "-" indicates a 157 bp deletion in gene *bb0021*
  - 2 Number of 54 codon repeats in gene *bb0210 (Imp1)*
  - 3 Number of 20 codon repeats in gene *bb0546*
  - 4 Number of 11 codon repeats in gene *bb0801*
- fs Contains frameshift in DNA sequence  
st Contains in-frame stop codon
