# Supplementary material for: Inter- and intra-specific pan-genomes of Borrelia burgdorferi sensu lato: genome stability and adaptive radiation
Source: PubMed Central journal article supplement (PMC3833655; doi:10.1186/1471-2164-14-693), 2013-10-10
Supplement: 1471-2164-14-693-S3.pdf [file 1471-2164-14-693-S3.pdf]

**Supplementary Table 3** : Chromosome structural differences between *B. burgdorferi* B31 and *B. afzelii* PKo and ACA-1

| Difference relative to B31                   | B31 | PKo                    | ACA-1                  |
|----------------------------------------------|-----|------------------------|------------------------|
| <i>bb0138</i> present                        | +   | –                      | –                      |
| No. of repeats in <i>bb0210</i>              | 7   | 5                      | 5                      |
| <i>bb0223</i> present                        | +   | –                      | –                      |
| Insert in <i>bb0309</i>                      | –   | 44 bp                  | 44 bp                  |
| <i>bmpA</i> gene duplication                 | –   | +                      | +                      |
| 16S rRNA gene duplication                    | –   | + <sup>a</sup>         | + <sup>a</sup>         |
| Insert between <i>bb0456</i> & <i>0457</i>   | –   | 56 bp                  | 56bp                   |
| Deletion between <i>bb0472</i> & <i>0473</i> | –   | 171 bp                 | 171 bp                 |
| Deletion between <i>bb473</i> & <i>0475</i>  | –   | ~145 bp <sup>a,b</sup> | ~145 bp <sup>a,b</sup> |
| Indel between <i>bb522</i> & <i>0524</i>     | –   | ~250 bp <sup>b</sup>   | ~250 bp <sup>b</sup>   |
| No. of repeats in <i>bb0546</i>              | 5   | 3                      | 4                      |
| Insert in <i>bb0744</i> (p83/p100)           | –   | ~118 bp <sup>b</sup>   | ~118 bp <sup>b</sup>   |
| Deletion in <i>bb0749</i>                    | –   | 143 bp                 | 143 bp                 |
| Insert between <i>bb0796</i> & <i>797</i>    | –   | ~330 bp <sup>b</sup>   | ~330 bp <sup>b</sup>   |
| No. of repeats in <i>bb0801</i>              | 12  | 6                      | 12                     |

### Footnotes for Table S3

+ Present

– Not present

a. *bb0423*, *bb0424* and *bb0474* in the original B31 annotation were small ORFs that are not open in other *burgdorferi* genomes, so they have been removed from that annotation. All three of these regions are affected in PKo and ACA-1.

b. Rearrangement is more complex than simple deletion; value depends on precise choice of endpoints.
