# Supplementary material for: Inter- and intra-specific pan-genomes of Borrelia burgdorferi sensu lato: genome stability and adaptive radiation
Source: PubMed Central journal article supplement (PMC3833655; doi:10.1186/1471-2164-14-693), 2013-10-10

**Supplementary Figure 1: *B. burgdorferi* chromosomal differences in the gene 0522-0524 region.**

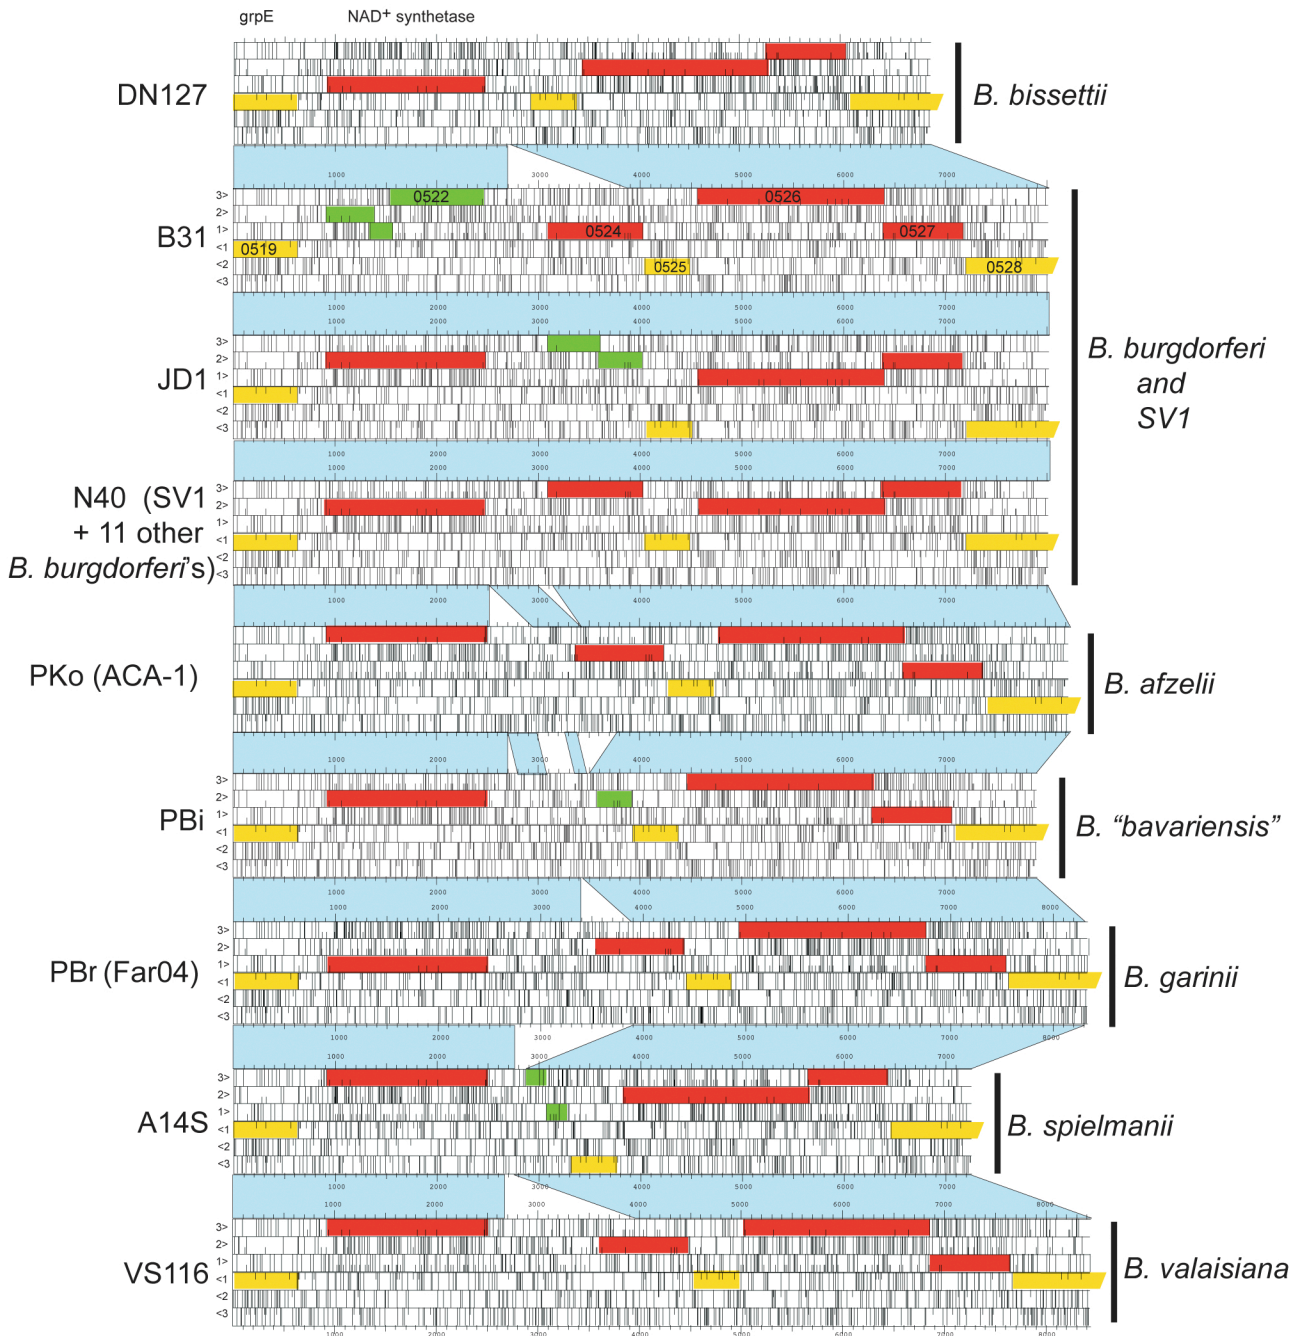

Supplement: 1471-2164-14-693-S4.pdf [file 1471-2164-14-693-S4.pdf]
